# Supplementary material
Source: PubMed Central journal article supplement (PMC2772413)
Supplement: EC.00228-09_1.pdf [file EC.00228-09_1.pdf]

## SUPPLEMENTAL FIGURES LEGENDS

Suppl. FIG. 1. (A) Distribution of chitin in lateral walls (solid bars) and in mother-daughter cell neck (cross-hatched bars) of strain 4250-3B, measured as previously described (4). (B) Overall distribution of chitin after random growth. Both in A and B purified zymolyase was used.

Suppl. FIG. 2. Effect of stress, as represented by high temperature, on chitin distribution in wild type and *crh* mutants. Measurements were as published (7), except that purified zymolyase was used.

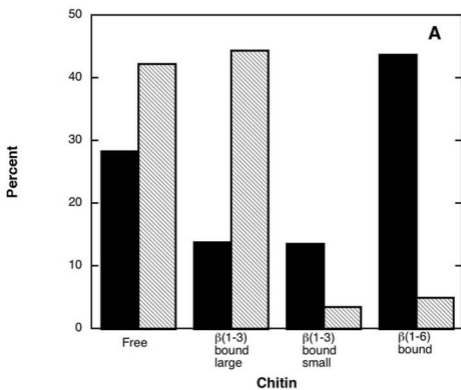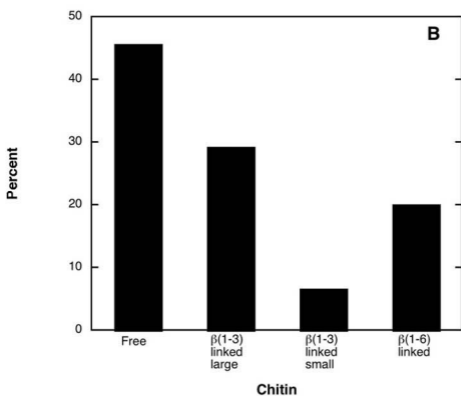

**Suppl. Fig. 1**

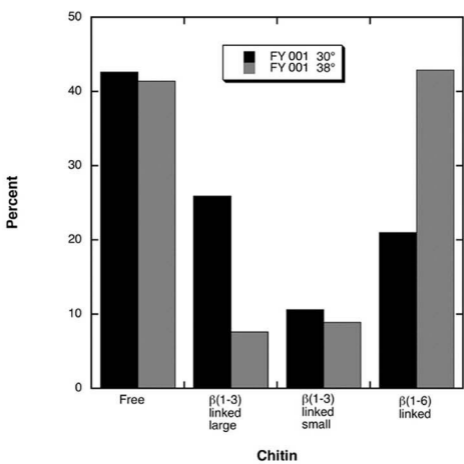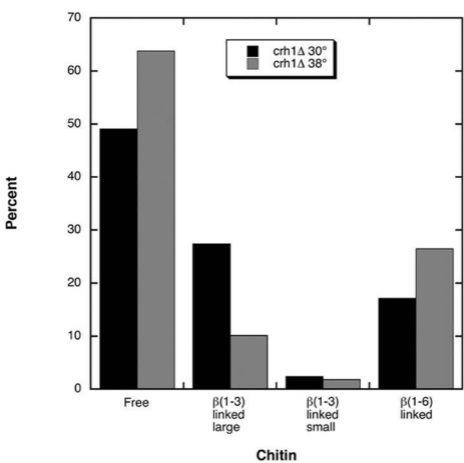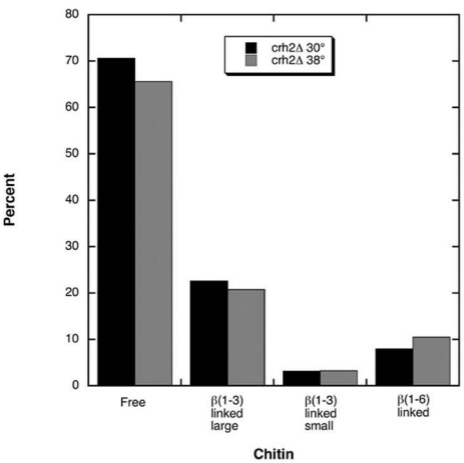

**Suppl. Fig. 2**
